# Supplementary material for: Facile one-step synthesis of a WO3/ZnWO4 heterojunction modified using ZnFe LDH enhances the PEC water splitting efficiency
Source: Royal Society of Chemistry journal article supplement (doi:10.1039/d4dt01883d), 2024-01-01
Supplement: d4dt01883d1.pdf [file d4dt01883d1.pdf]

## Materials

$(\text{NH}_4)_6\text{H}_2\text{W}_{12}\text{O}_{40}\cdot x\text{H}_2\text{O}$ : Shanghai Aladdin Biochemical Technology Co., Ltd., AR;  $\text{Zn}(\text{NO}_3)_2\cdot 6\text{H}_2\text{O}$ ,  $\text{FeSO}_4\cdot 7\text{H}_2\text{O}$ : Xilong Chemical Co., Ltd., AR;  $\text{Na}_2\text{WO}_4\cdot 2\text{H}_2\text{O}$ ,  $(\text{NH}_4)_2\text{C}_2\text{O}_4\cdot \text{H}_2\text{O}$ : Shanghai Macklin Biochemical Technology Co., Ltd., AR; HCl: Sinopharm Chemical Reagent Co., Ltd., AR; FTO: 2.2 mm in thickness,  $14\ \Omega$  in resistance, 90% in transmittance, 350 nm in conductive film thickness, Wuhan Jingge Solar Technology Co.; With all reagents being of analytical grade without further purification, the solution solvent was deionised water.

## Characterizations

Scanning electron microscopy (SEM; Zeiss Supra 55) was taken at an accelerating voltage of 15 kV. High-resolution transmission electron microscopy (HRTEM; JEOL JEM-2100) images were recorded at an accelerating voltage of 200 kV. X-ray diffraction analysis (XRD; Rigaku UltimaIII) was performed at a scanning speed of  $10^\circ/\text{min}$  in the range of  $5\text{-}70^\circ$  diffraction angle. UV-visible diffuse reflectance spectra were recorded on a UV-visible spectrophotometer (Shimadzu UV-2501PC). Raman spectra were collected using a 785 nm laser as an excitation source (LabRAM Aramis). X-ray photoelectron spectroscopy (XPS) spectra were performed with an Axis supra X-ray photoelectron spectroscopy.

## Electrochemical measurements of photoanode

PEC water splitting performance tests were measured by an electrochemical workstation (Shanghai Chenhua CHI660E) in 0.5 M  $\text{Na}_2\text{SO}_4$  electrolyte. The prepared  $\text{WO}_3/\text{ZnWO}_4/\text{ZnFe}$  LDH photoanode ( $1\times 2\ \text{cm}^2$ ) was the working electrode, and the

reference and counter electrodes were Ag/AgCl and Pt wires. The illumination source was a 300 W xenon arc lamp (AM 1.5 G filter) with an output power of  $100 \text{ mW} \cdot \text{cm}^{-2}$ . Photocurrents were measured by linear scanning voltammetry (LSV) at a scan rate of  $20 \text{ mV} \cdot \text{s}^{-1}$ . Mott-Schottky plot measurements were performed in the dark at a frequency of 1 kHz. Electrochemical impedance spectroscopy (EIS) was measured at  $10^5$  to 0.1 Hz in the light.

The  $E_{\text{RHE}}$  was calculated by:

$$E_{\text{RHE}} = E_{\text{Ag/AgCl}} + E_{\text{Ag/AgCl}}^0 + 0.059pH \quad (1)$$

Where  $E_{\text{Ag/AgCl}}^0 = 0.197V$  at room temperature

The incident photon-to-current conversion efficiency (IPCE) can be calculated by the following Eq. (2):

$$IPCE = 1240 \times I/P_{\text{light}} \times \lambda \quad (2)$$

Where  $P_{\text{light}}$ ,  $\lambda$  and  $I$  are light intensity ( $\text{mW} \cdot \text{cm}^{-2}$ ), wavelength (nm) and photocurrent density ( $\text{mA} \cdot \text{cm}^{-2}$ ), respectively.

The applied bias photon-to-current efficiency (ABPE) of photoanodes can be estimated through Eq. (3):

$$ABPE = J(1.23 - E_{\text{RHE}})/P_{\text{light}} \quad (3)$$

Where  $J$  ( $\text{mA} \cdot \text{cm}^{-2}$ ) refers to the photocurrent density of the tested photoanode.

Mott-Schottky tests were performed at 1 kHz in the dark and the flat band potential ( $V_{\text{FB}}$ ) and carrier density ( $N_{\text{D}}$ ) of the photoanode were calculated based on the M-S curves and the following Eq. (4) and (5).

$$\frac{1}{c^2} = \frac{2}{\varepsilon\varepsilon_0 A^2 e N_D} \left( V - V_{FB} - \frac{k_B T}{e} \right) \quad (4)$$

$$N_D = \frac{2}{e\varepsilon\varepsilon_0} \left[ \frac{d(1/c^2)}{dV} \right]^{-1} \quad (5)$$

Where  $A$ ,  $\varepsilon$ ,  $\varepsilon_0$ ,  $e$  and  $V$  are the area of working electrode, the relative permittivity of a semiconductor electrode, the vacuum permittivity, the elementary charge and the applied potential,  $k_B T/e$  is the temperature dependent term and can be neglected at room temperature.

The PEC water oxidation photocurrent density can be expressed as the following Eq. (6) and (7):

$$J_{H_2O} = J_{abs} \cdot \eta_{inj} \cdot \eta_{sep} \quad (6)$$

$$\eta_{inj} = \frac{J_{H_2O}}{J_{Na_2SO_3}} \times 100\% \quad (7)$$

where  $J_{H_2O}$  and  $J_{Na_2SO_3}$  are photocurrent density measured without and with hole scavengers, respectively;  $J_{abs}$  is the maximum theoretical high current density, a constant derived from the region of overlap between the UV-Vis absorption spectrum and the AM 1.5G solar spectrum;  $\eta_{inj}$  is the electron injection efficiency;  $\eta_{sep}$  is the electron separation efficiency.

Eq. 6 reflects the energy loss in different reaction steps in PEC water splitting. In order to calculate the detailed efficiency of each step, a hole scavenger is added to the electrolyte to eliminate the energy loss from surface water oxidation, which assumes that  $\eta_{inj} = 1$ . Thus, it results that  $J_{Na_2SO_3} = J_{abs} \cdot \eta_{sep}$ , and  $\eta_{sep}$  can be derived quite simply

by measuring the photocurrent density with the addition of the hole scavenger. By combining the equation  $J_{\text{Na}_2\text{SO}_4} = J_{\text{abs}} \cdot \eta_{\text{sep}}$  and Eq. 6,  $\eta_{\text{sep}}$  can be calculated (Eq. 7).

## Supplementary Figures

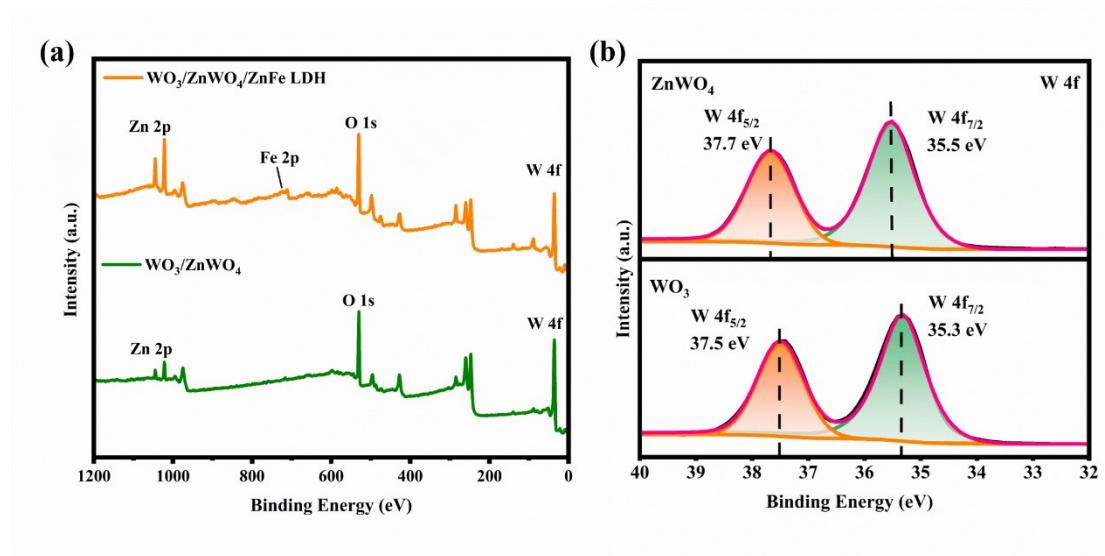

**Fig. S1** (a) XPS survey scan spectra of different photoanodes; (b) XPS spectra of W 4f for  $\text{WO}_3$  and  $\text{ZnWO}_4$

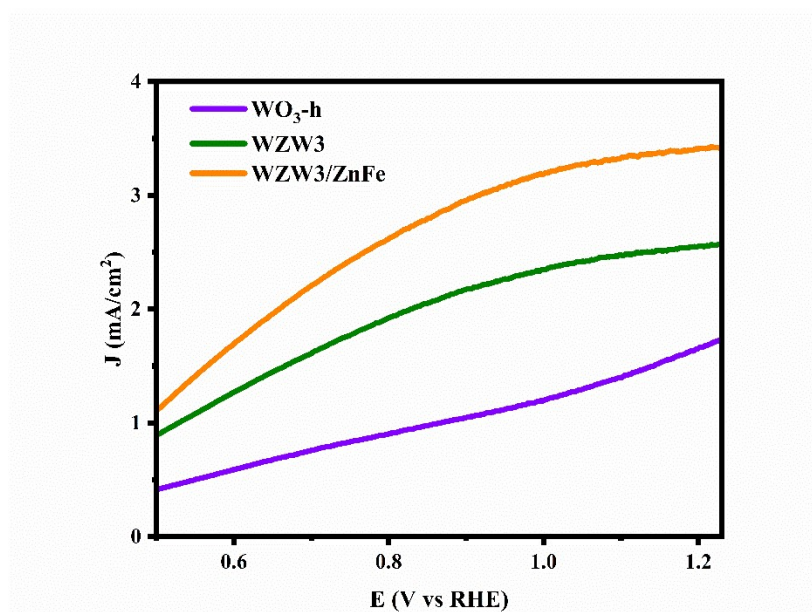

**Fig. S2** Photocurrent-potential curves with hole scavengers

The fitted straight line represents the rate of hydrogen (or oxygen) evolution as shown in Fig. S3. The rates of oxygen and hydrogen evolution for  $\text{WO}_3/\text{ZnWO}_4/\text{ZnFe}$  LDH were  $0.1913 \mu\text{mol}\cdot\text{min}^{-1}$  and  $0.3852 \mu\text{mol}\cdot\text{min}^{-1}$ , respectively.

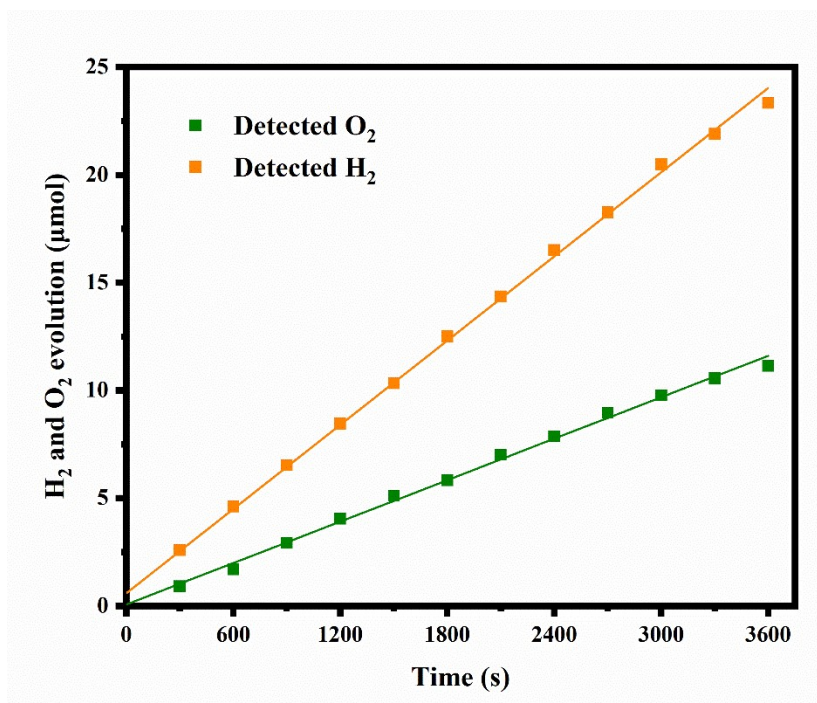

**Fig. S3** Hydrogen and oxygen evolution curves of  $\text{WO}_3/\text{ZnWO}_4/\text{ZnFe}$  LDH
